# Supplementary material
Source: HighWire-hosted journal article supplement (http://www.ajnr.org/highwire/filestream/71069/field_highwire_adjunct_files/0/19-00325.pdf)
Supplement: 19-00325.pdf [file 19-00325.pdf]

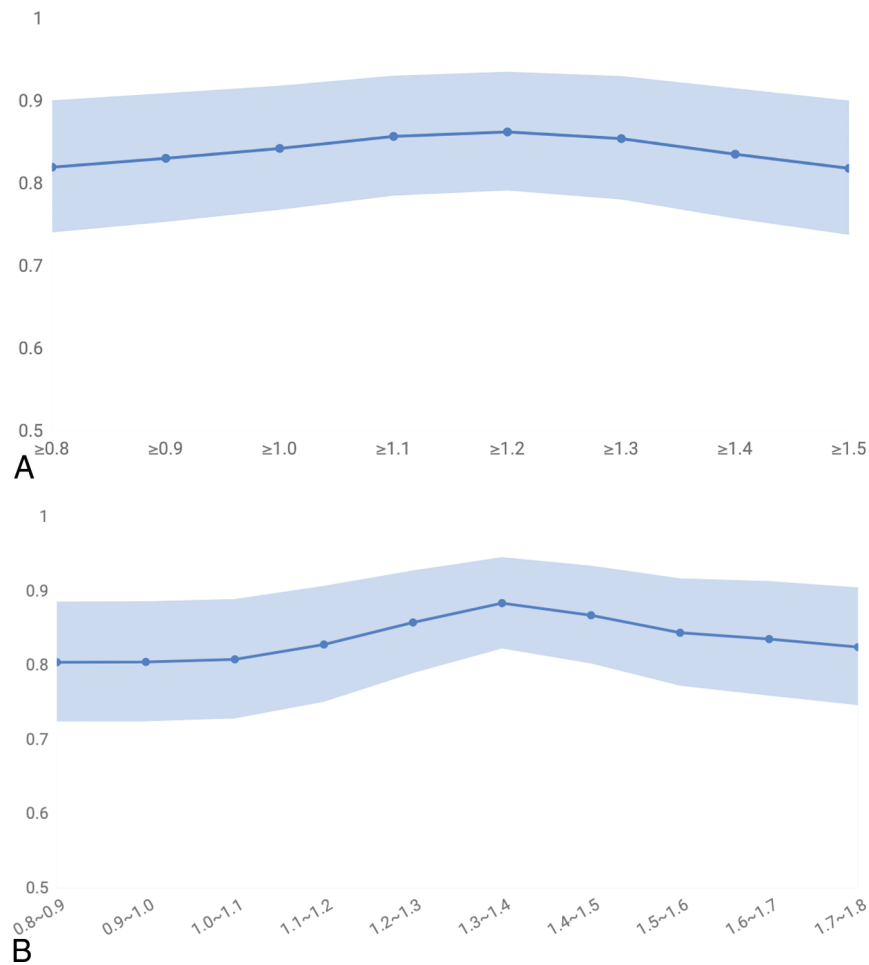

**ON-LINE FIG 1.** Summary of AUC of models tested in this study. A, NPS of  $\geq 1.2$  provided the highest AUC among tested thresholds from  $\geq 0.8$  to  $\geq 1.5$ . B, NPS 1.3~1.4 provided the highest AUC among tested thresholds from 0.8~0.9 to 1.7~1.8.

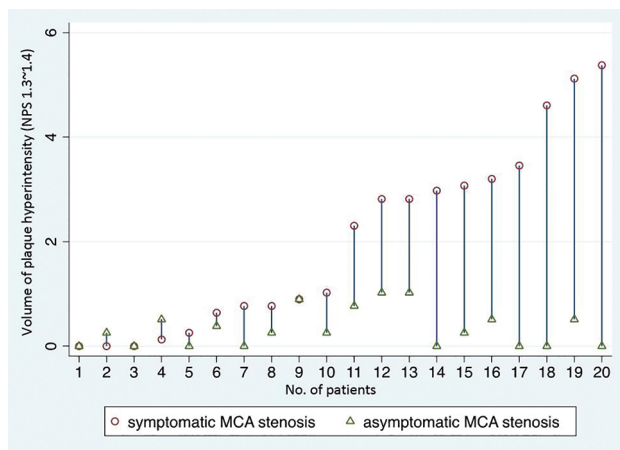

**ON-LINE FIG 2.** A paired plot of patients with bilateral MCA stenosis. The paired plot shows the volume difference of plaque hyperintensity between symptomatic MCA stenosis and asymptomatic MCA stenosis in each individual.

**On-line Table 1: Models tested for differentiation of symptomatic and asymptomatic MCA stenosis in patients with non-fat-suppressed imaging**

| Factors Included in Logistic Regression Model   | OR (95% CI)      | AUC (95% CI)        |
|-------------------------------------------------|------------------|---------------------|
| NPS $\geq 1.3$ , per 1-mm <sup>3</sup> increase | 6.73 (1.7–26.62) | 0.864 (0.784–0.944) |
| Stenosis degree, per 10% increase               | 1.68 (1.04–2.71) |                     |
| Remodeling ratio, per 0.1 increase              | 1.23 (0.84–1.81) |                     |
| NPS 1.3~1.4, per 1-mm <sup>3</sup> increase     | 1.33 (1.02–1.73) | 0.840 (0.744–0.937) |
| Stenosis degree, per 10% increase               | 1.82 (1.17–2.82) |                     |
| Remodeling ratio, per 0.1 increase              | 1.22 (0.84–1.76) |                     |

**On-line Table 2: Models tested for differentiation of symptomatic and asymptomatic MCA stenosis**

| Factors Included in Logistic Regression Model   | OR (95% CI)       | AUC (95% CI)        |
|-------------------------------------------------|-------------------|---------------------|
| NPS $\geq 0.8$ , per 1-mm <sup>3</sup> increase | 1.04 (0.98–1.1)   | 0.820 (0.740–0.900) |
| Stenosis degree, per 10% increase               | 2.17 (1.4–3.37)   |                     |
| Remodeling ratio, per 0.1 increase              | 1.43 (1.04–1.97)  |                     |
| Fat-suppressed imaging                          | 2.37 (0.82–6.85)  |                     |
| NPS $\geq 0.9$ , per 1-mm <sup>3</sup> increase | 1.07 (0.99–1.15)  | 0.831 (0.753–0.909) |
| Stenosis degree, per 10% increase               | 2.06 (1.33–3.20)  |                     |
| Remodeling ratio, per 0.1 increase              | 1.41 (1.02–1.93)  |                     |
| Fat-suppressed imaging                          | 2.56 (0.88–7.48)  |                     |
| NPS $\geq 1.0$ , per 1-mm <sup>3</sup> increase | 1.12 (1.02–1.24)  | 0.843 (0.768–0.918) |
| Stenosis degree, per 10% increase               | 2.00 (1.28–3.11)  |                     |
| Remodeling ratio, per 0.1 increase              | 1.40 (1.02–1.93)  |                     |
| Fat-suppressed imaging                          | 2.75 (0.93–8.13)  |                     |
| NPS $\geq 1.1$ , per 1-mm <sup>3</sup> increase | 1.20 (1.05–1.38)  | 0.858 (0.785–0.930) |
| Stenosis degree, per 10% increase               | 1.96 (1.25–3.07)  |                     |
| Remodeling ratio, per 0.1 increase              | 1.42 (1.03–1.97)  |                     |
| Fat-suppressed imaging                          | 2.82 (0.95–8.42)  |                     |
| NPS $\geq 1.2$ , per 1-mm <sup>3</sup> increase | 1.30 (1.06–1.58)  | 0.863 (0.791–0.935) |
| Stenosis degree, per 10% increase               | 1.98 (1.26–3.10)  |                     |
| Remodeling ratio, per 0.1 increase              | 1.45 (1.05–2.00)  |                     |
| Fat-suppressed imaging                          | 2.63 (0.89–7.81)  |                     |
| NPS $\geq 1.3$ , per 1-mm <sup>3</sup> increase | 1.34 (1.04–1.73)  | 0.855 (0.780–0.930) |
| Stenosis degree, per 10% increase               | 2.05 (1.32–3.19)  |                     |
| Remodeling ratio, per 0.1 increase              | 1.47 (1.07–2.03)  |                     |
| Fat-suppressed imaging                          | 2.51 (0.85–7.38)  |                     |
| NPS $\geq 1.4$ , per 1-mm <sup>3</sup> increase | 1.29 (0.98–1.72)  | 0.836 (0.757–0.915) |
| Stenosis degree, per 10% increase               | 2.15 (1.40–3.30)  |                     |
| Remodeling ratio, per 0.1 increase              | 1.48 (1.08–2.04)  |                     |
| Fat-suppressed imaging                          | 2.33 (0.81–6.75)  |                     |
| NPS $\geq 1.5$ , per 1-mm <sup>3</sup> increase | 1.18 (0.87–1.59)  | 0.819 (0.737–0.900) |
| Stenosis degree, per 10% increase               | 2.26 (1.48–3.45)  |                     |
| Remodeling ratio, per 0.1 increase              | 1.48 (1.08–2.03)  |                     |
| Fat-suppressed imaging                          | 2.13 (0.75–6.03)  |                     |
| NPS 0.8~0.9, per 1-mm <sup>3</sup> increase     | 0.91 (0.76–1.08)  | 0.804 (0.724–0.885) |
| Stenosis degree, per 10% increase               | 2.57 (1.67–3.97)  |                     |
| Remodeling ratio, per 0.1 increase              | 1.55 (1.13–2.15)  |                     |
| Fat-suppressed imaging                          | 1.89 (0.67–5.36)  |                     |
| NPS 0.9~1.0, per 1-mm <sup>3</sup> increase     | 0.94 (0.77–1.15)  | 0.805 (0.724–0.886) |
| Stenosis degree, per 10% increase               | 2.52 (1.63–3.90)  |                     |
| Remodeling ratio, per 0.1 increase              | 1.54 (1.12–2.13)  |                     |
| Fat-suppressed imaging                          | 1.94 (0.68–5.50)  |                     |
| NPS 1.0~1.1, per 1-mm <sup>3</sup> increase     | 1.02 (0.78–1.33)  | 0.808 (0.728–0.889) |
| Stenosis degree, per 10% increase               | 2.42 (1.58–3.70)  |                     |
| Remodeling ratio, per 0.1 increase              | 1.50 (1.09–2.08)  |                     |
| Fat-suppressed imaging                          | 2.06 (0.72–5.89)  |                     |
| NPS 1.1~1.2, per 1-mm <sup>3</sup> increase     | 1.46 (0.97–2.19)  | 0.828 (0.750–0.906) |
| Stenosis degree, per 10% increase               | 2.15 (1.39–3.31)  |                     |
| Remodeling ratio, per 0.1 increase              | 1.43 (1.04–1.96)  |                     |
| Fat-suppressed imaging                          | 2.61 (0.89–7.66)  |                     |
| NPS 1.2~1.3, per 1-mm <sup>3</sup> increase     | 2.56 (1.31–4.99)  | 0.858 (0.789–0.927) |
| Stenosis degree, per 10% increase               | 1.96 (1.24–3.09)  |                     |
| Remodeling ratio, per 0.1 increase              | 1.44 (1.04–2.00)  |                     |
| Fat-suppressed imaging                          | 2.62 (0.88–7.8)   |                     |
| NPS 1.3~1.4, per 1-mm <sup>3</sup> increase     | 6.25 (1.9–20.57)  | 0.884 (0.822–0.945) |
| Stenosis degree, per 10% increase               | 1.99 (1.24–3.19)  |                     |
| Remodeling ratio, per 0.1 increase              | 1.51 (1.08–2.10)  |                     |
| Fat-suppressed imaging                          | 2.88 (0.93–8.95)  |                     |
| NPS 1.4~1.5, per 1-mm <sup>3</sup> increase     | 5.99 (1.83–19.63) | 0.868 (0.802–0.934) |
| Stenosis degree, per 10% increase               | 2.16 (1.34–3.48)  |                     |
| Remodeling ratio, per 0.1 increase              | 1.54 (1.10–2.16)  |                     |
| Fat-suppressed imaging                          | 3.11 (0.99–9.75)  |                     |
| NPS 1.5~1.6, per 1-mm <sup>3</sup> increase     | 8.48 (1.46–49.15) | 0.844 (0.772–0.916) |
| Stenosis degree, per 10% increase               | 2.09 (1.35–3.25)  |                     |
| Remodeling ratio, per 0.1 increase              | 1.52 (1.10–2.10)  |                     |
| Fat-suppressed imaging                          | 2.53 (0.85–7.58)  |                     |

*Continued on next page*

**On-line Table 2: Continued**

| Factors Included in Logistic Regression Model | OR (95% CI)       | AUC (95% CI)        |
|-----------------------------------------------|-------------------|---------------------|
| NPS 1.6~1.7, per 1-mm <sup>3</sup> increase   | 7.07 (0.97–51.52) | 0.836 (0.758–0.913) |
| Stenosis degree, per 10% increase             | 2.14 (1.40–3.27)  |                     |
| Remodeling ratio, per 0.1 increase            | 1.49 (1.08–2.05)  |                     |
| Fat-suppressed imaging                        | 2.16 (0.74–6.30)  |                     |
| NPS 1.7~1.8, per 1-mm <sup>3</sup> increase   | 4.68 (0.58–37.43) | 0.825 (0.746–0.904) |
| Stenosis degree, per 10% increase             | 2.25 (1.48–3.41)  |                     |
| Remodeling ratio, per 0.1 increase            | 1.49 (1.08–2.04)  |                     |
| Fat-suppressed imaging                        | 2.19 (0.76–6.26)  |                     |
